# Supplementary material for: Eco-friendly porous iron(iii) oxide micromotors for efficient wastewater cleaning
Source: Royal Society of Chemistry journal article supplement (doi:10.1039/c9nj02592h), 2019-01-01
Supplement: c9nj02592h1.pdf [file c9nj02592h1.pdf]

## Eco-friendly Porous Iron (III) Oxides Micromotors for Efficient Wastewater Cleaning

Xia Peng, Hongli Zhu, Huijun Chen, Xiaomiao Feng\*, Ruiqing Liu, Zhendong Huang, Qingming Shen, Yanwen Ma\* and Lianhui Wang

Key Laboratory for Organic Electronics and Information Displays & Institute of Advanced Materials (IAM), Jiangsu National Synergistic Innovation Center for Advanced Materials (SICAM), Nanjing University of Posts & Telecommunications, 9 Wenyuan Road, Nanjing210023, China.

E-mail: iamxmfeng@njupt.edu.cn; iamywma@njupt.edu.cn

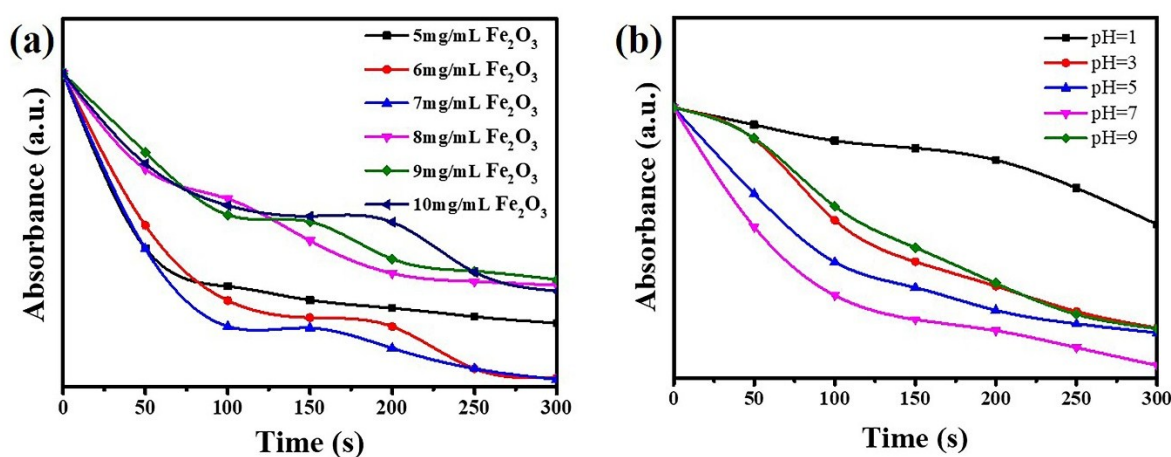

**Fig S1** Effect of Fe<sub>2</sub>O<sub>3</sub> micromotors with different concentration in 1% H<sub>2</sub>O<sub>2</sub>(a)and pH on the adsorption of MB in 1% H<sub>2</sub>O<sub>2</sub> and 7mg mL<sup>-1</sup>Fe<sub>2</sub>O<sub>3</sub>(b).

**Video S1** Comparison of catalytic properties of PB and Fe<sub>2</sub>O<sub>3</sub> micromotors in 10% H<sub>2</sub>O<sub>2</sub> and 0.33% Triton X-100.

**Video S2** Self-propelled movement of Fe<sub>2</sub>O<sub>3</sub> micromotors in 1%-10% H<sub>2</sub>O<sub>2</sub> and 0.33% Triton X-100.

**Video S3** Movement of Fe<sub>2</sub>O<sub>3</sub> micromotors under applied magnetic field in 3% H<sub>2</sub>O<sub>2</sub> solution and 0.33% Triton X-100.

**Video S4** Movement of Fe<sub>2</sub>O<sub>3</sub> micromotors during different timeperiods of 0, 30, 60, 90and120 min in 7% H<sub>2</sub>O<sub>2</sub> solution and 0.33% Triton X-100.

**Video S5** Effect of H<sub>2</sub>O<sub>2</sub> on adsorption of methyl blue.

**Video S6** Comparative experiments on adsorption of methyl blue by Fe<sub>2</sub>O<sub>3</sub> micromotors in 0.1% H<sub>2</sub>O<sub>2</sub>.
